# Supplementary material for: Relation of Minimally Processed Foods and Ultra-Processed Foods with the Mediterranean Diet Score, Time-Related Meal Patterns and Waist Circumference: Results from a Cross-Sectional Study in University Students
Source: MDPI journal article supplement (doi:10.3390/ijerph20042806), 2023-02-04

Supplementary Figure S1: Scatter dot plots between UPF and WC, BMI in the total sample, men and women

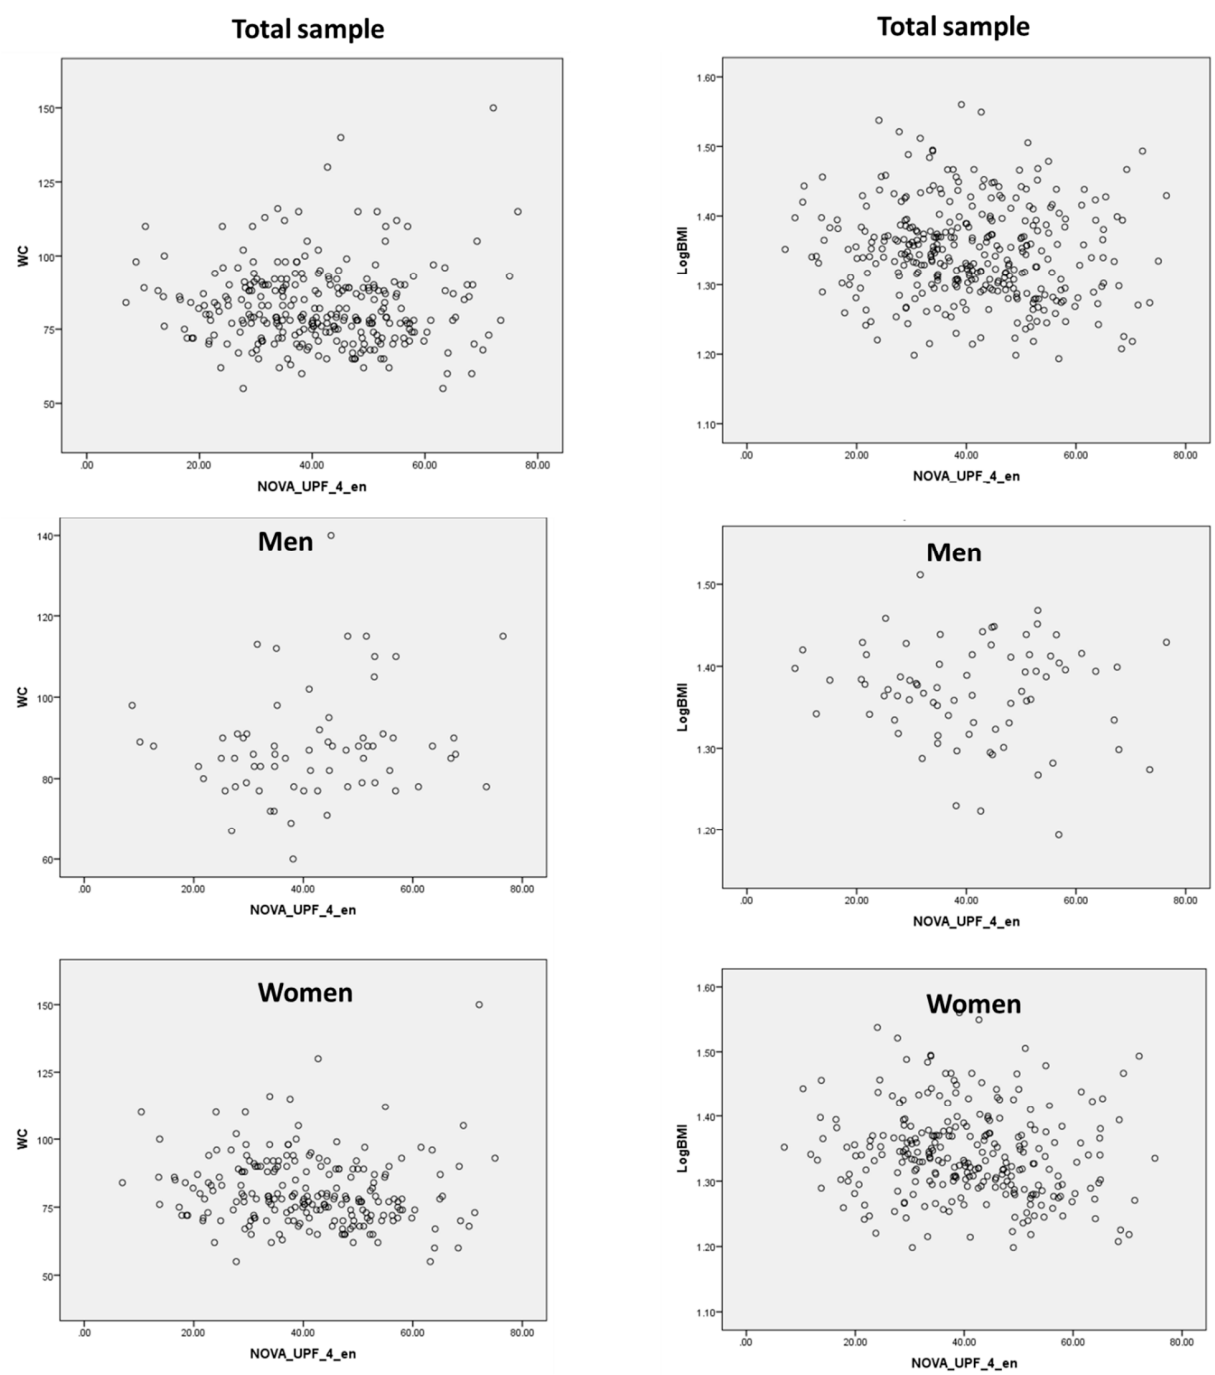

Supplementary Figure S2: Scatter dot plots between UPF and MedDietScore in the total sample, men and women.

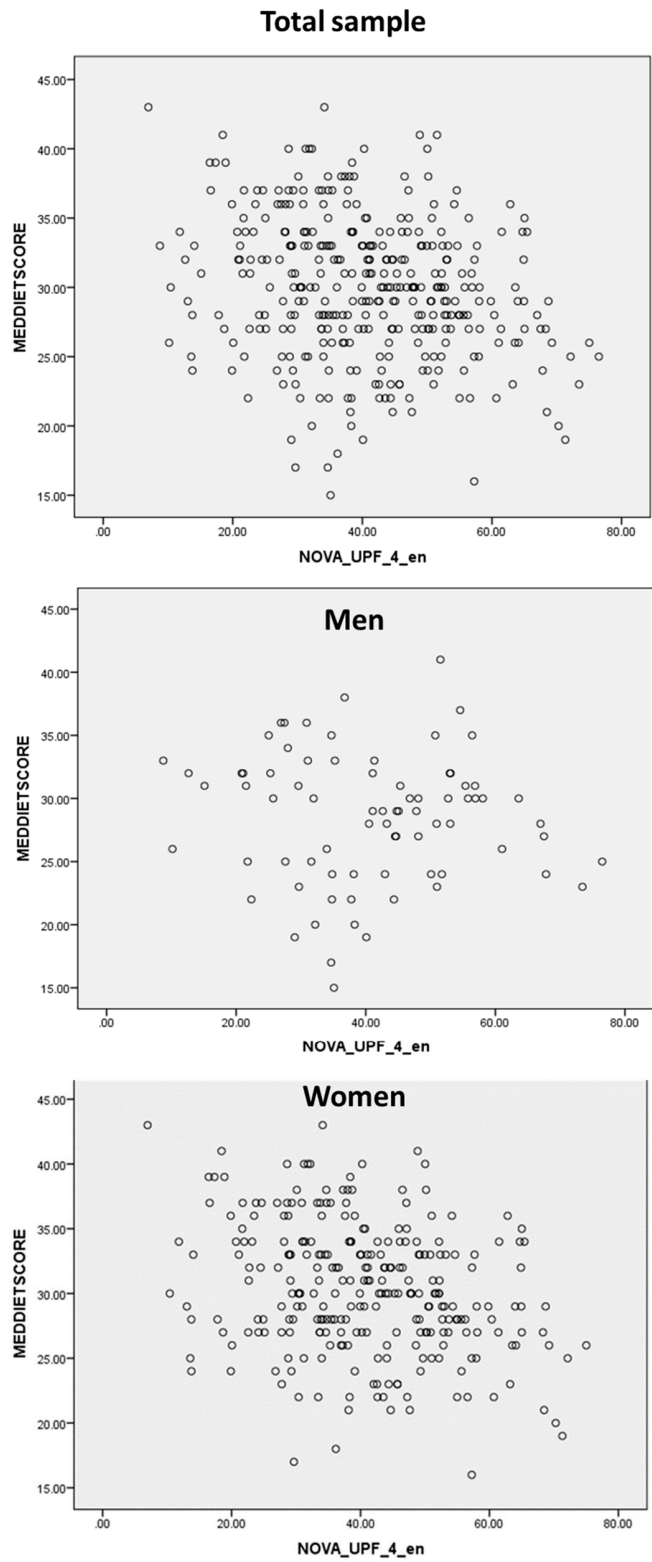

Supplementary Figure S3: Scatter dot plots between UPF and early, late eating patterns in the total sample, men and women.

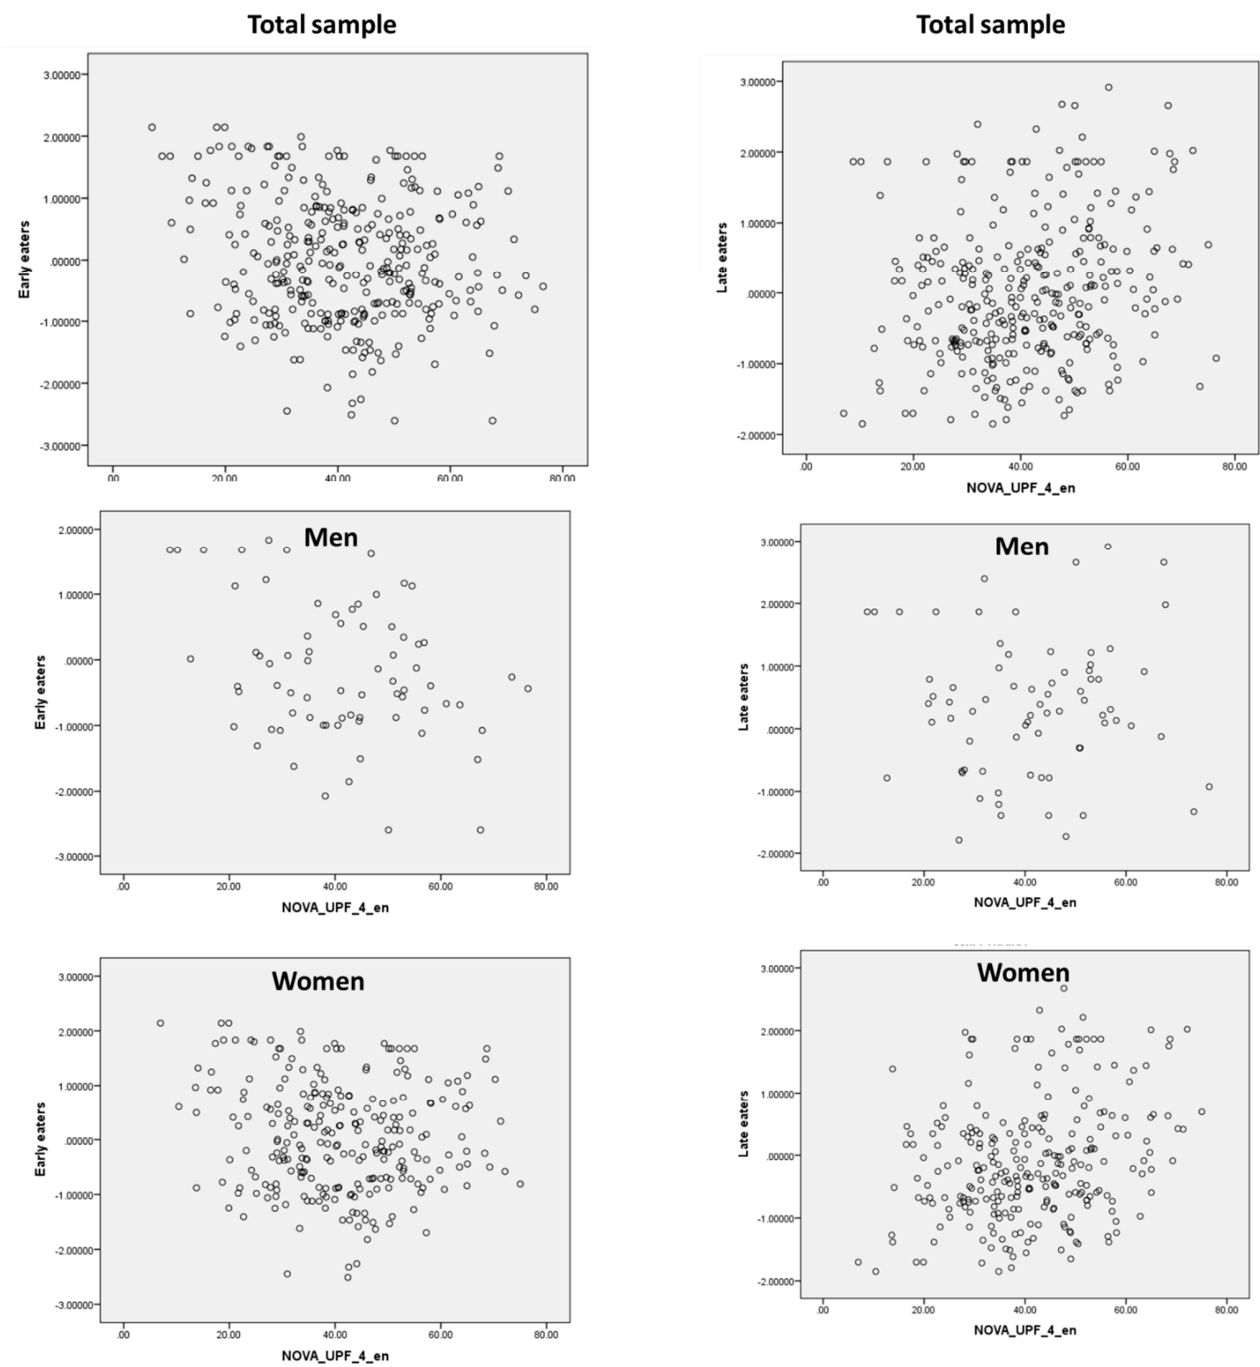

Supplement: s1 [file s1]
