# Supplementary material for: Relation of Minimally Processed Foods and Ultra-Processed Foods with the Mediterranean Diet Score, Time-Related Meal Patterns and Waist Circumference: Results from a Cross-Sectional Study in University Students
Source: MDPI journal article supplement (doi:10.3390/ijerph20042806), 2023-02-04
Supplement: s1 [file s1]

Supplementary Table S1: Additional linear regression analysis for I/WC in the total sample, men and women with MedDietScore and eating patterns as covariates.

| Dependent variable: 1/WC                                           |                          | Total sample         |       |           |       |                        |                         | Men                    |       |           |       |                        |                          | Women                  |       |           |       |                        |  |
|--------------------------------------------------------------------|--------------------------|----------------------|-------|-----------|-------|------------------------|-------------------------|------------------------|-------|-----------|-------|------------------------|--------------------------|------------------------|-------|-----------|-------|------------------------|--|
| adj R <sup>2</sup> = 18.3%                                         |                          |                      |       |           |       |                        |                         |                        |       |           |       |                        |                          |                        |       |           |       |                        |  |
|                                                                    | B                        | SE                   | p     | Tolerance | VIF   | adj R <sup>2</sup> (%) | B                       | SE                     | p     | Tolerance | VIF   | adj R <sup>2</sup> (%) | B                        | SE                     | p     | Tolerance | VIF   | adj R <sup>2</sup> (%) |  |
| Model 1:<br>Basic Model                                            | 3.6 × 10 <sup>-6</sup>   | 5 × 10 <sup>-6</sup> | 0.645 | 0.935     | 1.070 | 18.3                   | -3 × 10 <sup>-5</sup>   | 10 <sup>-5</sup>       | 0.050 | 0.807     | 1.239 | 22.3                   | 1.5 × 10 <sup>-5</sup>   | 10 <sup>-5</sup>       | 0.188 | 0.949     | 1.054 | 11.1                   |  |
| Model 2:<br>Basic Model +MedDietScore                              | -1.05 × 10 <sup>-6</sup> | 10 <sup>-5</sup>     | 0.911 | 0.857     | 1.167 | 12.7                   | -3.20× 10 <sup>-5</sup> | 1.7 × 10 <sup>-5</sup> | 0.059 | 0.882     | 1.134 | 19.2                   | -3.36 × 10 <sup>-5</sup> | 3.1 × 10 <sup>-5</sup> | 0.284 | 0.797     | 1.255 | 8.1                    |  |
| Model 3:<br>Basic Model + early/ late eating patterns              | 2.16 × 10 <sup>-6</sup>  | 10 <sup>-5</sup>     | 0.824 | 0.829     | 1.206 | 12.8                   | -2.64 ×10 <sup>-5</sup> | 1.9 × 10 <sup>-5</sup> | 0.175 | 0.606     | 1.651 | 14.2                   | 1.22 × 10 <sup>-5</sup>  | 1.2 × 10 <sup>-5</sup> | 0.295 | 0.813     | 1.230 | 7.0                    |  |
| Model 4:<br>Basic Model+ MedDietScore+ early/ late eating patterns | -1.51 × 10 <sup>-6</sup> | 10 <sup>-5</sup>     | 0.881 | 0.778     | 1.286 | 13.3                   | 1.94× 10 <sup>-6</sup>  | 4.5 × 10 <sup>-5</sup> | 0.184 | 0.591     | 1.692 | 11.9                   | 7.17 × 10 <sup>-6</sup>  | 1.2 × 10 <sup>-5</sup> | 0.564 | 0.719     | 1.390 | 7.3                    |  |

B unstandardised coefficients, SE, p-values, tolerance and VIF are displayed for total UPF (% of total energy). The adjR<sup>2</sup> is reported for the whole model.

Basic model was adjusted for age, sex, department, living area and underreporting and is the same reported in Table 3.

Early/late eating patterns were entered alltogether (early/medium/late eating pattern).
